# Supplementary material
Source: publisher figshare collection journal article supplement (https://sage.figshare.com/ndownloader/files/23727638)
Supplement: Supplementary file 1 [file 23727638]

**Climate change social perspectives: Questionnaire for urban and rural respondents**

No.______

Community_____________

Thank you for taking part of this survey. It will take 15min of your time to fill this questionnaire and by doing it you will help us to:

1. To explore into peoples’ perspectives of climate change; and to
2. Identify how people construct their understanding of climate change.

Your anonymity is highly ensured. Please do not feel you don’t know the answers since this questionnaire has been designed to explore into your perception and opinion rather than your knowledge.

1. **General information**
2. ¿What is your age? 20-30

31-40

41-50

51-60

61-70

71-80

1. ¿What is your gender? Masculine Feminine
2. ¿The place where you live is? Rural Urban
3. ¿What is your occupation?

College student Agriculturalist Public employee

PhD student Housewife School teacher

Scholar Musician Nurse/Doctor

Research asistant Business owner Private consultant

High school teacher Retired Freelancer

Other: _____________________________________________________________________________

1. **Causes and consequences of climate change**
2. ¿For what reasons do you think climate is changing? *Make a list of your answers*.

|  |
| --- |

1. In your opinion ¿Which ones could be the consequences of climate change? *Make a list of your answers.*

|  |
| --- |

1. **Personal risks perceived of climate change**
2. ¿Do you think that climate change is something that is going to affect you personally?

Yes No I don’t know

1. If your answer was “no”, please continue with question 9. If your answer was “yes”, ¿Could you please tell me in which way is going to affect you? *Please right down your answer*.

_____________________________________________________________________________

1. **General knowledge of climate change and climate processes**
2. How much do you agree or disagree with each of the following statements? *Please tick only one box on each line*

|  | ***Completely agree*** | ***Agree*** | ***Neither agree nor disagree*** | ***Disagree*** | ***Completely disagree*** | ***Don’t know*** |
| --- | --- | --- | --- | --- | --- | --- |
| 1. *Climate change is the same as global warming* |  |  |  |  |  |  |
| 1. *Global warming is occurring because the climate is changing* |  |  |  |  |  |  |
| 1. *Cold weather means the same as cold climate* |  |  |  |  |  |  |
| 1. *Climate often changes from year to year* |  |  |  |  |  |  |
| 1. *Climate means pretty much the same as weather* |  |  |  |  |  |  |
| 1. *A warmer or colder year is an indicator of climate change* |  |  |  |  |  |  |

1. Do you know what the greenhouse effect is? Yes No

If your answer was ‘no’, please continue with question 11, if your answer was ‘yes’ ¿Could you please explain your answer? *Please right down your answer*.

____________________________________________________________________________________________________________________________________________________

1. **Perception towards climate change adaptation and mitigation**
2. How much do you agree or disagree with each of the following statement? *Please tick only one option.*

|  | ***Completely agree*** | ***Agree*** | ***Neither agree nor disagree*** | ***Disagree*** | ***Completely disagree*** | ***Don’t know*** |
| --- | --- | --- | --- | --- | --- | --- |
| *Humanity should adapt to climate change and move on* |  |  |  |  |  |  |
| *Humanity should stop CO2 industrial emissions* |  |  |  |  |  |  |

1. **Climate change emotions**
2. How do you ***feel*** about climate change? *Please tick the boxes for all that apply, and explain why you feel in the way you have selected.*

| Concerned | *because* |
| --- | --- |
| Guilty | *because* |
| Powerless | *because* |
| Angry | *because* |
| Optimistic | *because* |
| Happy | *because* |
| Confused | *because* |
| Indifferent | *because* |
| Calm | *because* |
| Skeptic | *because* |

¡Thank you for your help! If you have any question, please contact to [mvi6@kent.ac.uk](mailto:mvi6@kent.ac.uk) or [mviniguez1@utpl.edu.ec](mailto:mviniguez1@utpl.edu.ec)

## Interview guide

1. **AGRICULTURALIST INFORMANT PROFILE DATA** *(Ask directly for Information)*

**Code name: _______________________________________________________**

**Community of Permanent Residence:** ___________________________________

**Type of farmer:** SUBSISTENCE COMMERCIAL

**Gender:** MALE FEMALE

**Age:** ___________ *(Number of years round up)*

**Years living in the community**: _______________

**Agriculturalist informant questioning route (2014-2015)**

**B. FARM CHANGES**

1. Food production: Do you produce the same crops and animals than before? / What have changed? What reasons have led these changes? What changes respond to climatic changes?

Probes:

- What crops have you planted this year and what kinds of animals are you raising?
- Are these the crops the same that your parents or grandparents have always grown?
- Are these the animals the same that your parents or grandparents have always raised?
- If the types of crops or animals have changed, ask: Why did you start using them?
- What kinds of agricultural practices that you use are successful (e.g., fertilize, controlled burning for grazing, weeding, yoke, plough machine)? *Try asking to explain the process of planting potatoes*.
- The agricultural practices you have are the same that your parents or grandparents had?
- If it has changed, what has it changed? And why did you change your agricultural practices?
- What in your opinion is the main problem agriculturalists face?

1. Food access and affordability: How do people ensure their access to food? How do they distribute their food? Does the type of food consumed have changed? What has motivated these changes? Do these changes in food consumption have to do with climate change?

Probes:

- Do you and your family use everything you produce, or do you sell or trade some of it?
- What produce are for self-consumption, what produce do you sell? And what produce do you trade?
- Did your parents or grandparents use to trade the produce? Tell me about it
- Tell me about the dishes your parents or grandparents used to cook
- Do you eat the same food that you used to as a kid? If no, why you don’t eat it any longer?
- Tell me about the food that you have to buy in the market or shops. Did your parents or grandparents use to buy food in the markets? What food?

1. Food stability: does food production (crops and animals) produce in the same amount than before? If not, what has happened? Does climate change have something to do with increasing or decreasing food produced?

Probes:

- Do you produce more or less than that you used to produce before? Tell me about it
- What about animals, do you have the same number of animals that you have now, what happened?
- What about your parents, do they have the number of animals and produce the same as before? What has changed?
- Do you have crops diseases that you did not have before? Tell me about them
- What else about your farm or land you use for agricultural purposes do you see changing?

**C. ADAPTATION TO CHANGES**

1. Adaptation: How farmers respond to changes including climatic changes if mentioned? Have farmers’ agricultural systems changed over the years?

Probes:

- What do you plant in the different months of the year? *Use seasonal calendar*
- What do you harvest in the different months of the year? *Use seasonal calendar*
- Have you or your parents always planted and harvested in these months?
- If something has changed related to planting and harvesting months, would you please explain me what has led these changes?
- What have you do to tackle these changes?
- Is there any crop that you cannot longer produce here? What had happened?
- Is there any crop that you think it will grow in this area, but you don’t have it?
- If so, what crops would you start planting if you could? Why would you do it?

**D. CLIMATE CHANGE**

1. Climate change: tell me about the changes you have seen around you in the last 30 years, what are the big changes? What is the main concern about changes? *Use examples like changes in forest, water, etc.*

Probes

- Tell me about the changes you have seen in the area.
- Should something be done about changes? What do you think it can be done?
- If climate change or global warming has been yet brought up to the conversation, ask about it directly. Have you ever heard about climate change? Tell me what you have heard.
- What do you know or think about climate change?
- Do you think that a climate change is going to affect you? Tell me about it.

**Thanks for your help!**
